# Supplementary material for: The neural basis of intelligence in fine-grained cortical topographies
Source: eLife journal article supplement (doi:10.7554/elife.64058), 2021-03-08

# A Prediction based on residual fine-grained functional connectivity

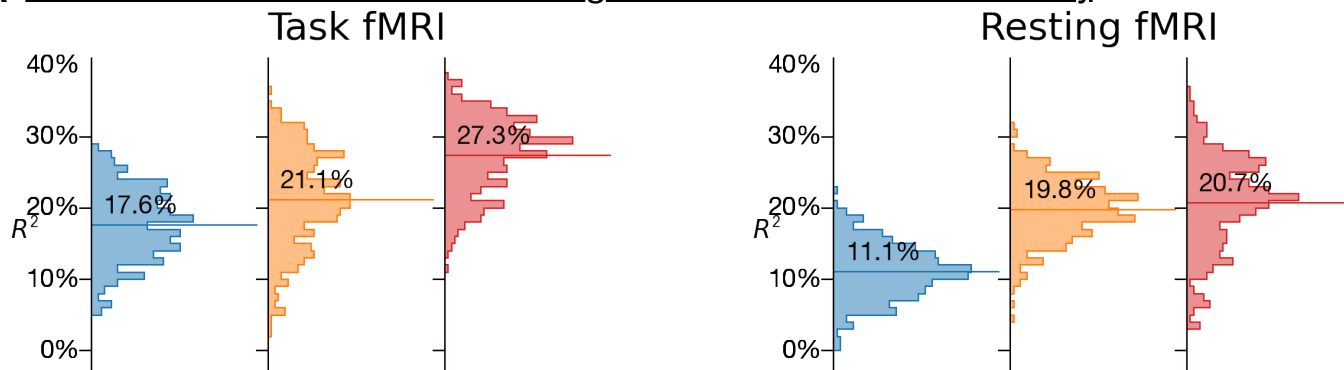

# B Prediction based on coarse-grained functional connectivity

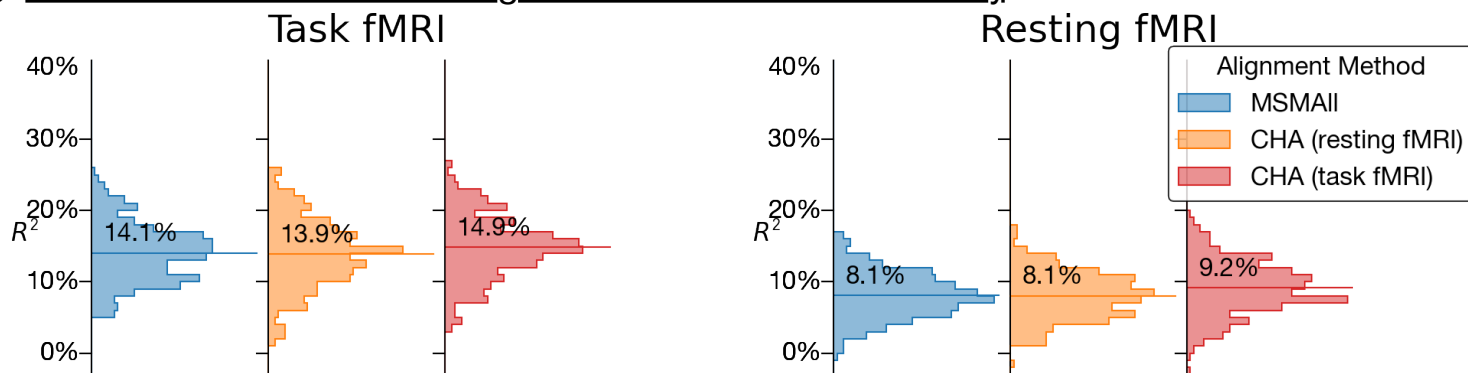

# C Prediction based on full fine-grained functional connectivity

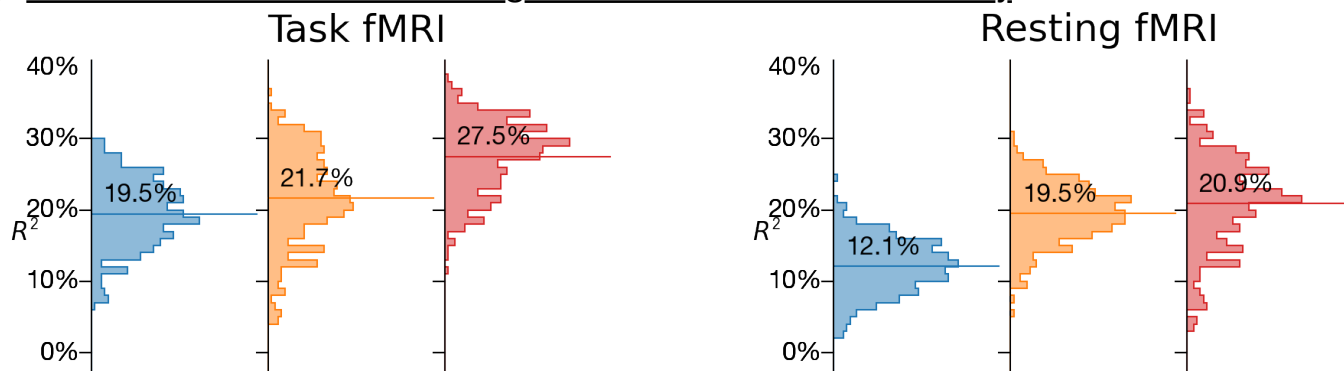

Supplement: supp [file elife_poa_e64058_Figure_3_figure_supplement_2.pdf › elife_poa_e64058_Figure_3_figure_supplement_2.pdf]
