# Supplementary material for: The neural basis of intelligence in fine-grained cortical topographies
Source: eLife journal article supplement (doi:10.7554/elife.64058), 2021-03-08

## A Parameters of models trained on task fMRI data

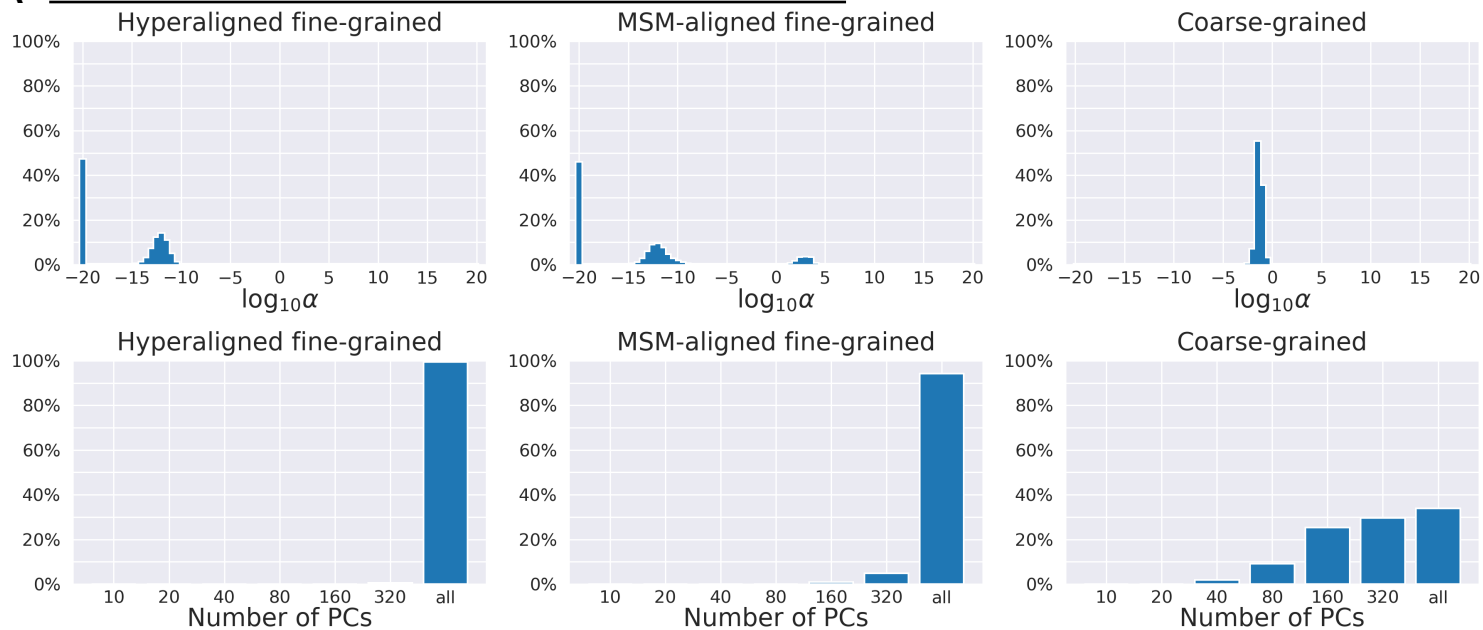

## B Parameters of models trained on resting fMRI data

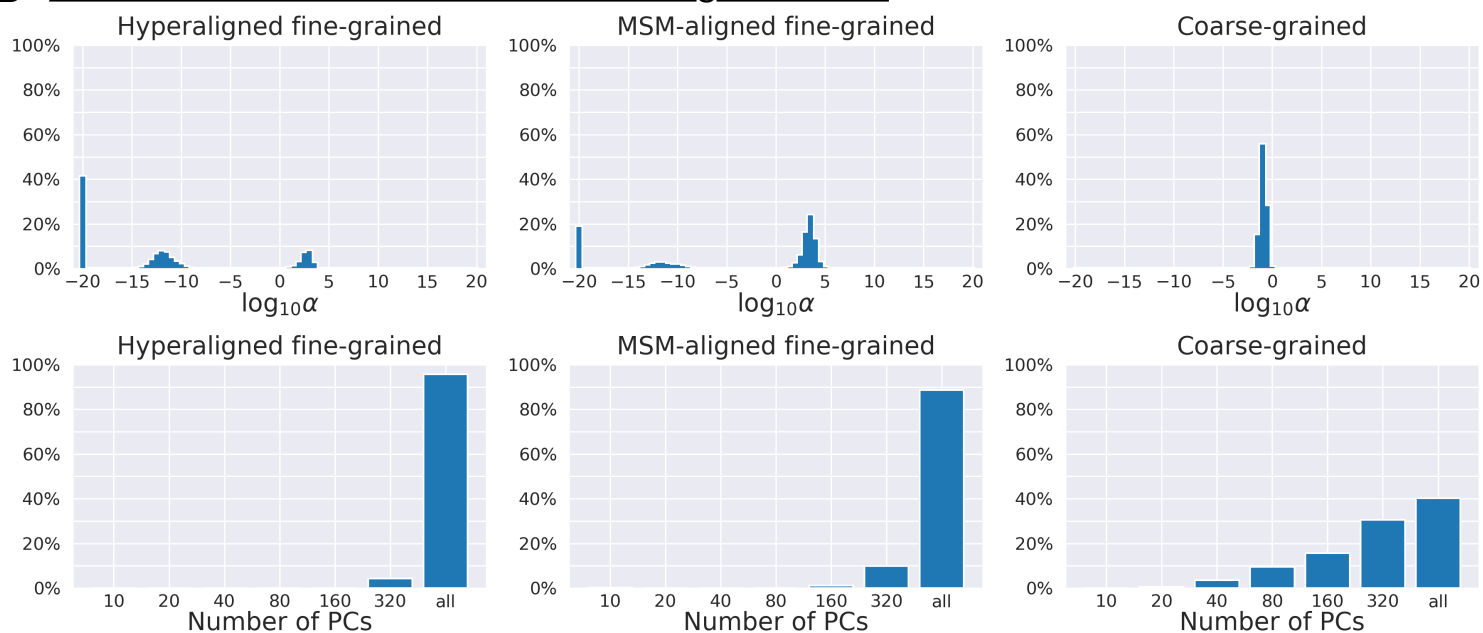

Supplement: supp [file elife_poa_e64058_Figure_3_figure_supplement_4.pdf › elife_poa_e64058_Figure_3_figure_supplement_4.pdf]
