# Supplementary material for: The neural basis of intelligence in fine-grained cortical topographies
Source: eLife journal article supplement (doi:10.7554/elife.64058), 2021-03-08

**A****Fluid intelligence as Penn Matrices score**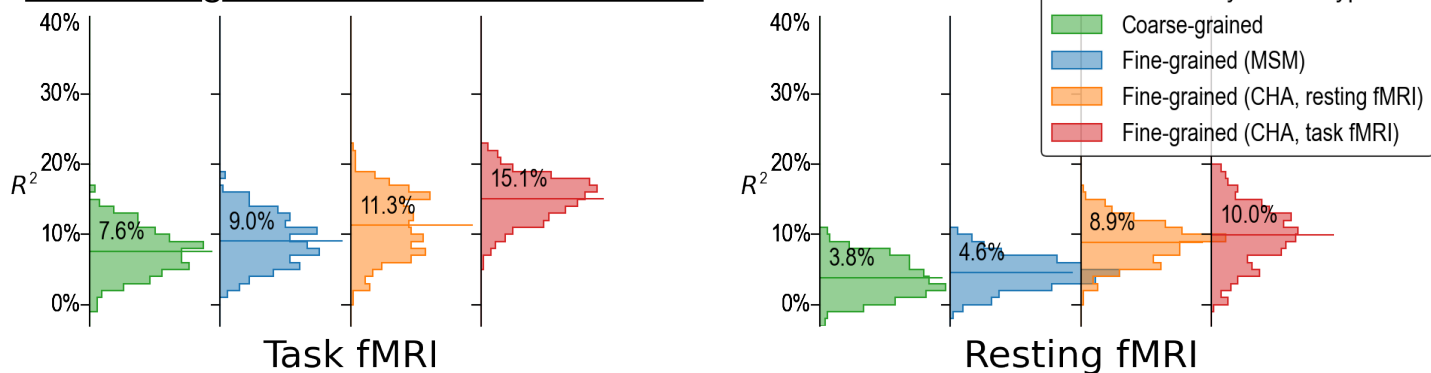**B****General intelligence as NIH Toolbox Cognitive Function Composite score**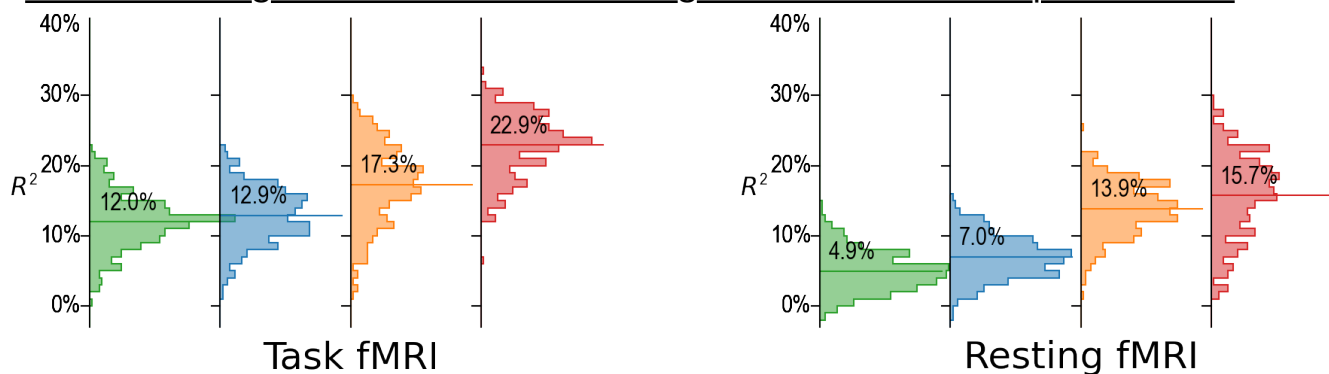**C****General intelligence as general factor of cognitive tasks**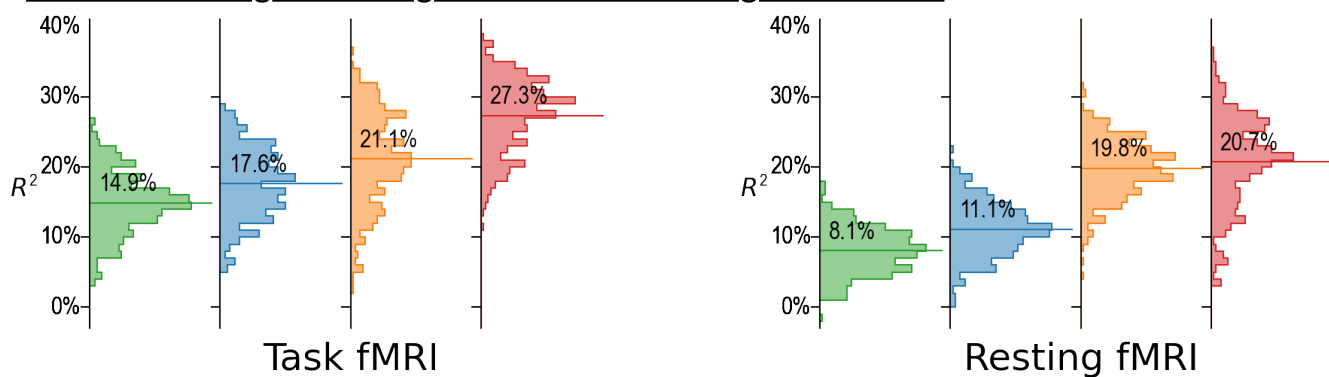

Supplement: supp [file elife_poa_e64058_Figure_3_figure_supplement_6.pdf › elife_poa_e64058_Figure_3_figure_supplement_6.pdf]
