# Supplementary material for: The neural basis of intelligence in fine-grained cortical topographies
Source: eLife journal article supplement (doi:10.7554/elife.64058), 2021-03-08

## Fluid intelligence as Penn Matrices score

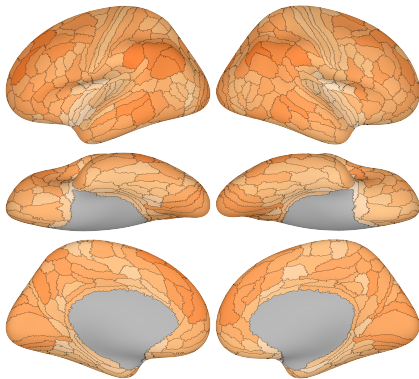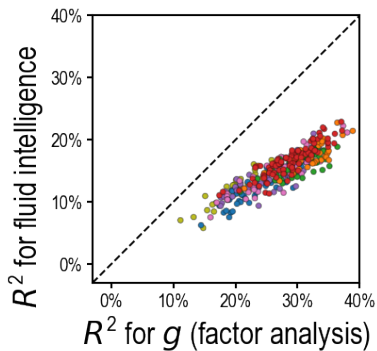

## General intelligence as NIH Toolbox Cognitive Function Composite score

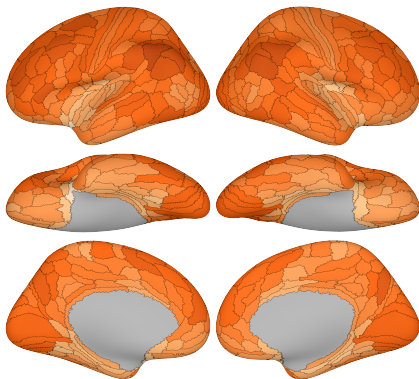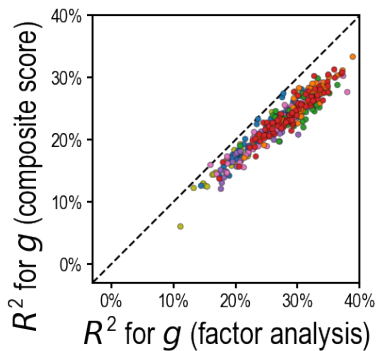

Supplement: supp [file elife_poa_e64058_Figure_3_figure_supplement_7.pdf › elife_poa_e64058_Figure_3_figure_supplement_7.pdf]
