# Supplementary material for: The neural basis of intelligence in fine-grained cortical topographies
Source: eLife journal article supplement (doi:10.7554/elife.64058), 2021-03-08

**A** Task fMRI connectivity (hyperligned fine-grained)

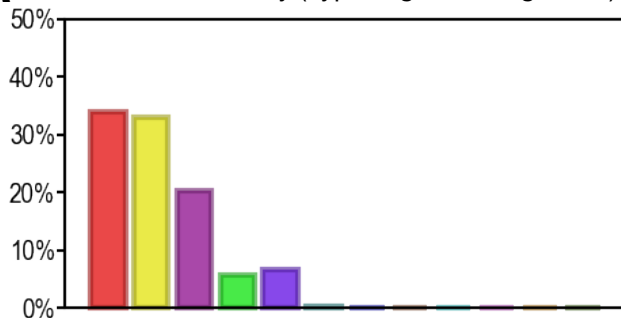

**B** Resting fMRI connectivity (hyperligned fine-grained)

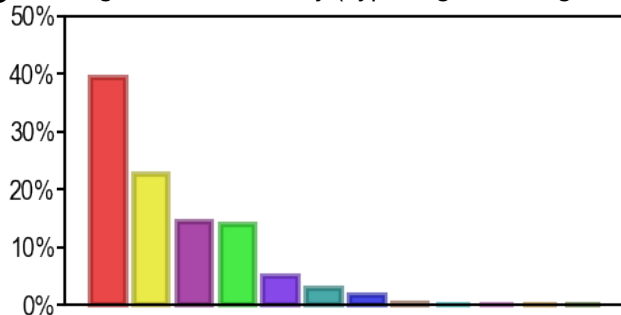

**Cortical Network**

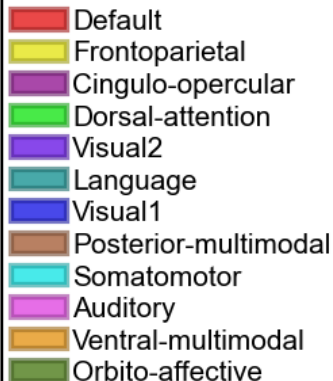

Supplement: supp [file elife_poa_e64058_Figure_3_figure_supplement_11.pdf › elife_poa_e64058_Figure_3_figure_supplement_11.pdf]
