# Supplementary figures and images for: The neural basis of intelligence in fine-grained cortical topographies
Source: eLife journal article supplement (doi:10.7554/elife.64058), 2021-03-08

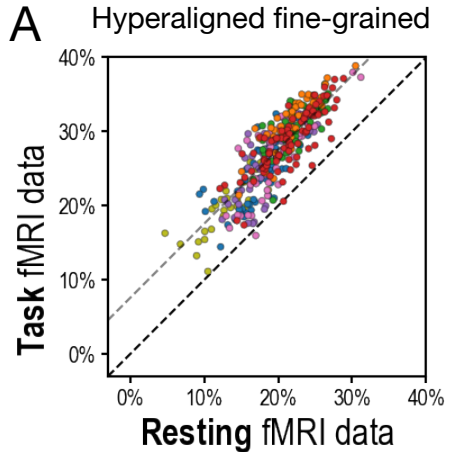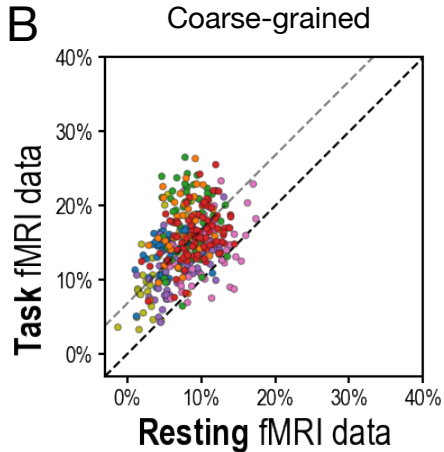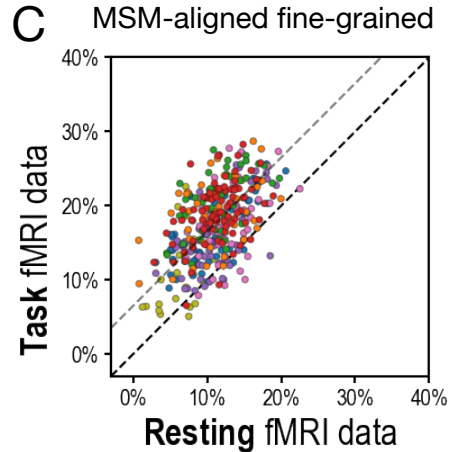

Supplement: supp [file elife_poa_e64058_Figure_3_figure_supplement_1.pdf › elife_poa_e64058_Figure_3_figure_supplement_1.pdf]

# Task fMRI functional connectivity

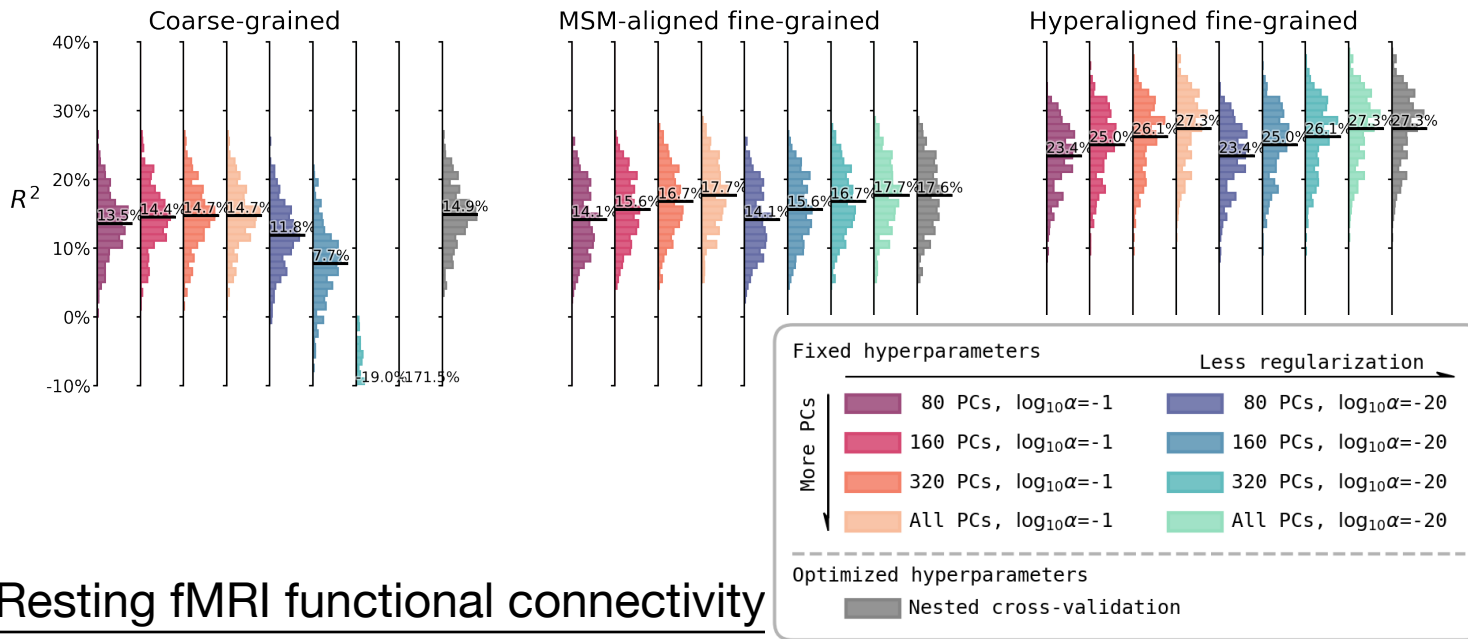

# Resting fMRI functional connectivity

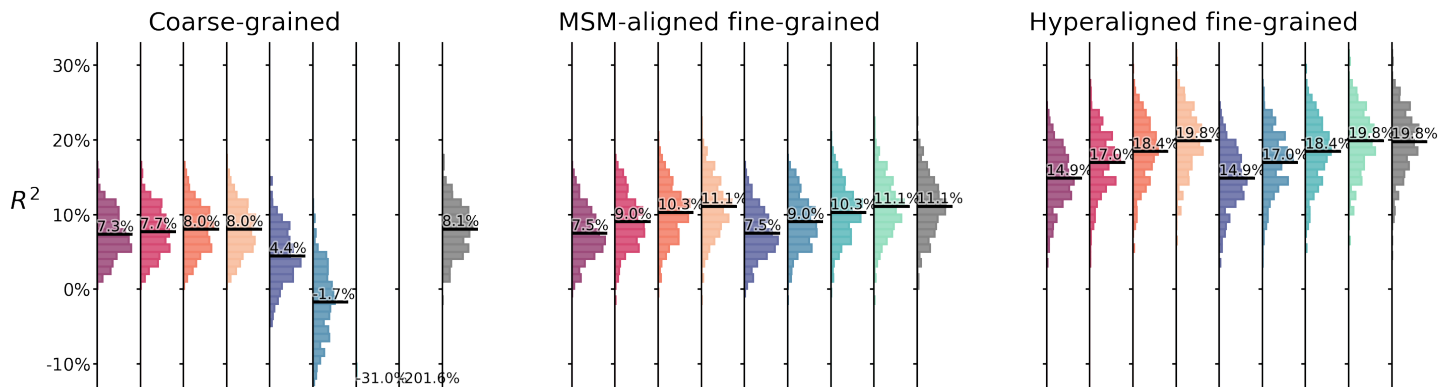

Supplement: supp [file elife_poa_e64058_Figure_3_figure_supplement_10.pdf › elife_poa_e64058_Figure_3_figure_supplement_10.pdf]

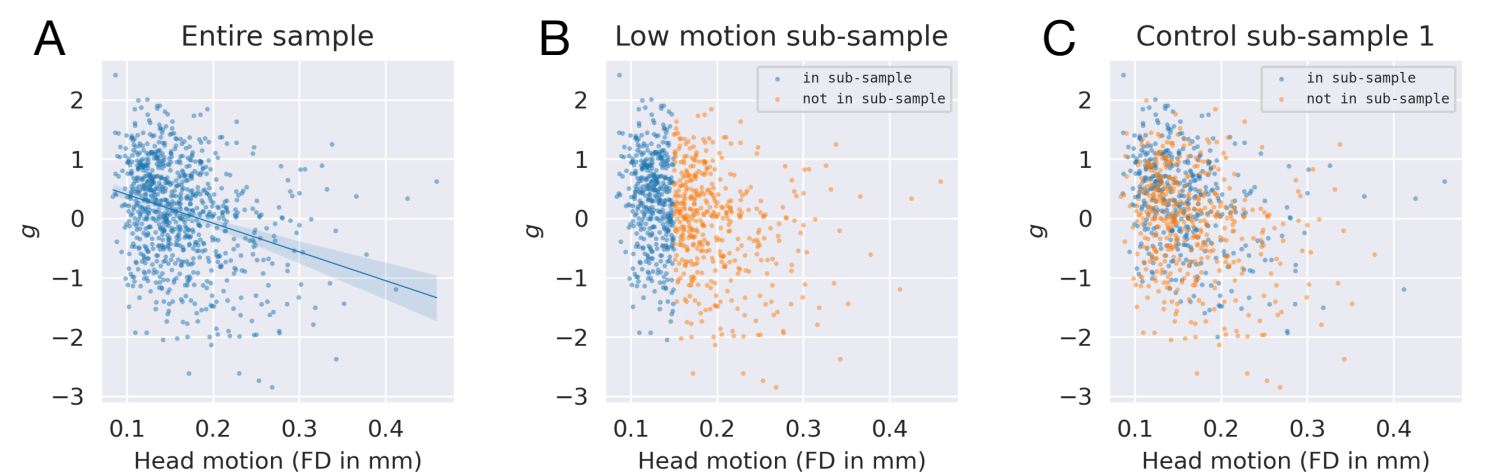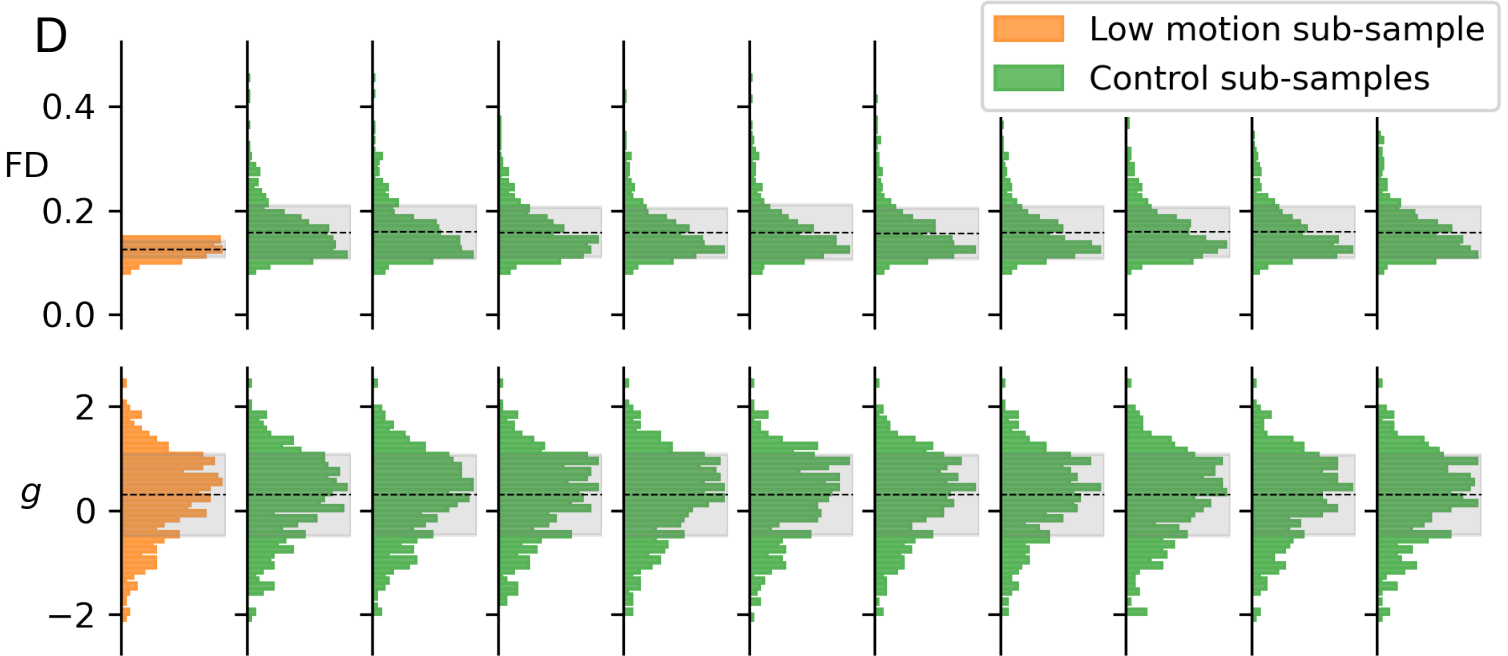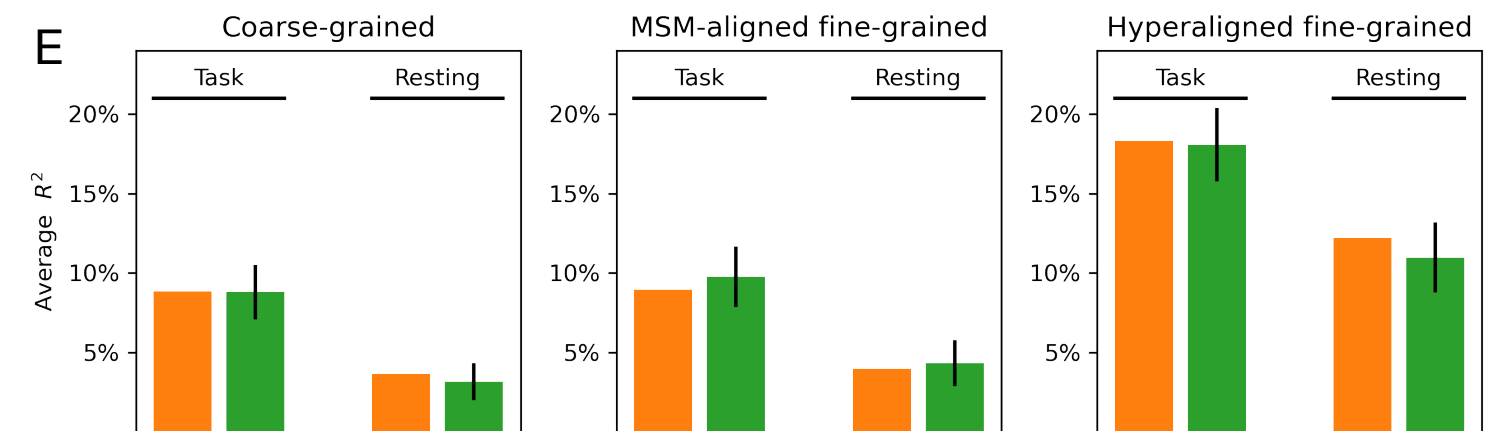

Supplement: supp [file elife_poa_e64058_Figure_3_figure_supplement_12.pdf › elife_poa_e64058_Figure_3_figure_supplement_12.pdf]

# Task fMRI functional connectivity

---

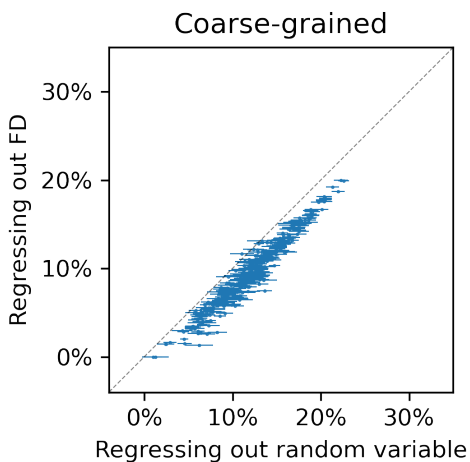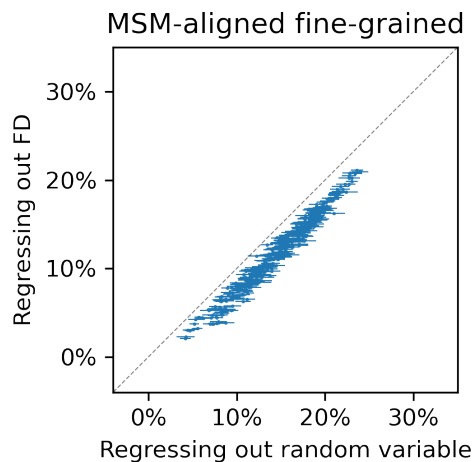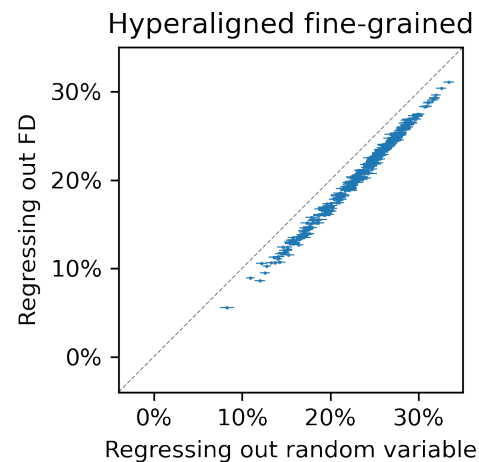

# Resting fMRI functional connectivity

---

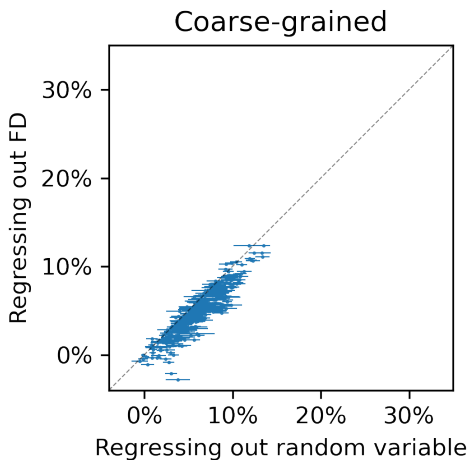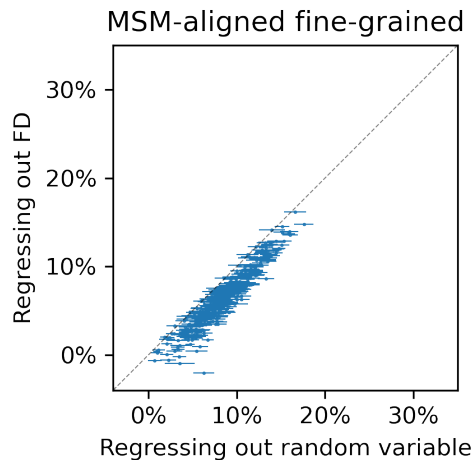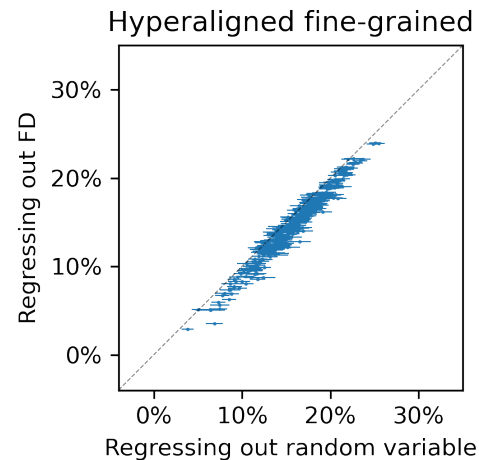

Supplement: supp [file elife_poa_e64058_Figure_3_figure_supplement_13.pdf › elife_poa_e64058_Figure_3_figure_supplement_13.pdf]

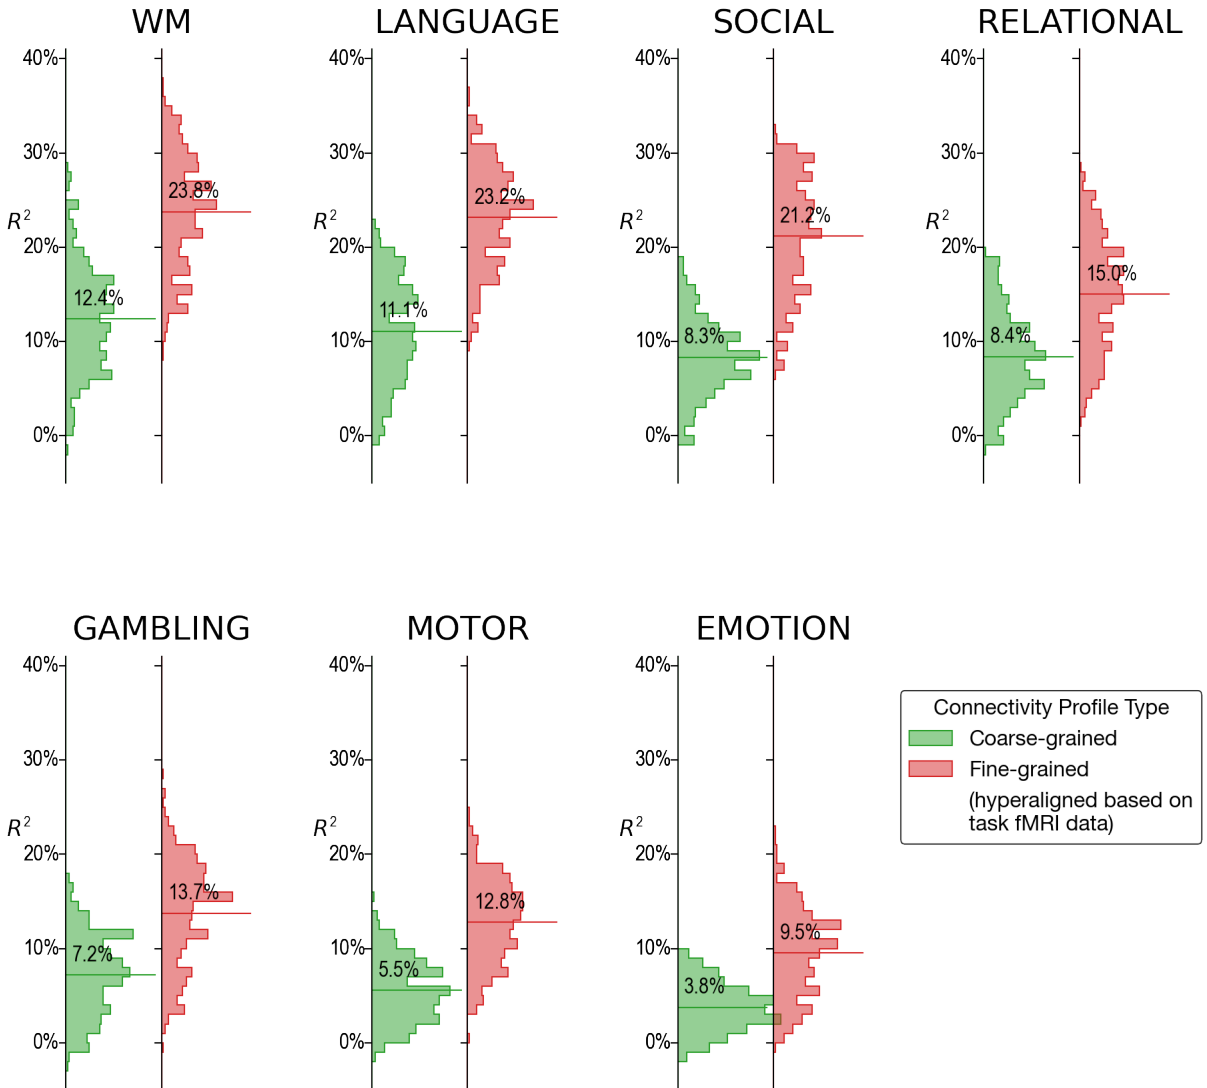

Supplement: supp [file elife_poa_e64058_Figure_3_figure_supplement_3.pdf › elife_poa_e64058_Figure_3_figure_supplement_3.pdf]

## A Permutation results based on task fMRI data

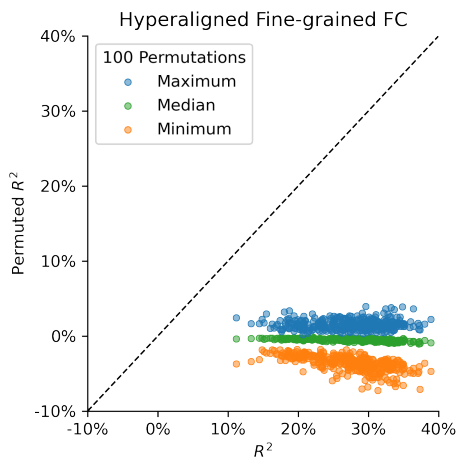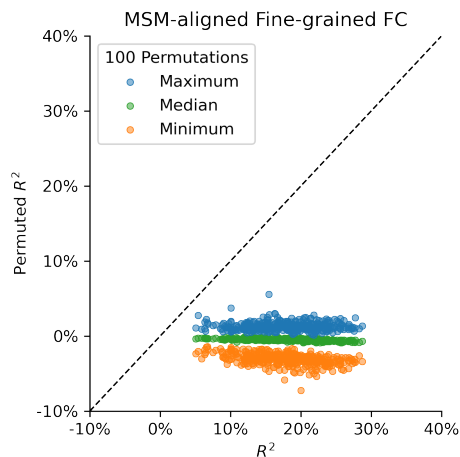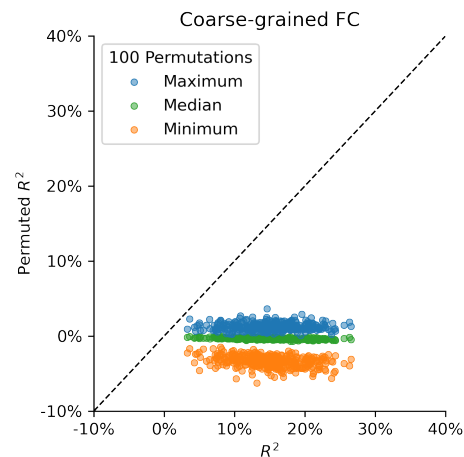

## B Permutation results based on resting fMRI data

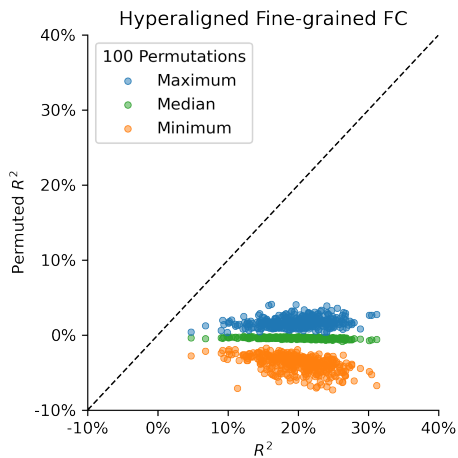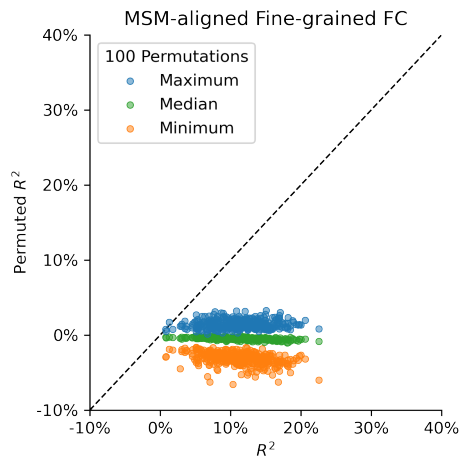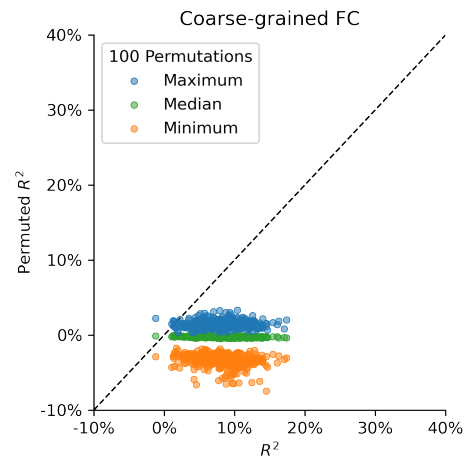

Supplement: supp [file elife_poa_e64058_Figure_3_figure_supplement_5.pdf › elife_poa_e64058_Figure_3_figure_supplement_5.pdf]

# Task fMRI functional connectivity

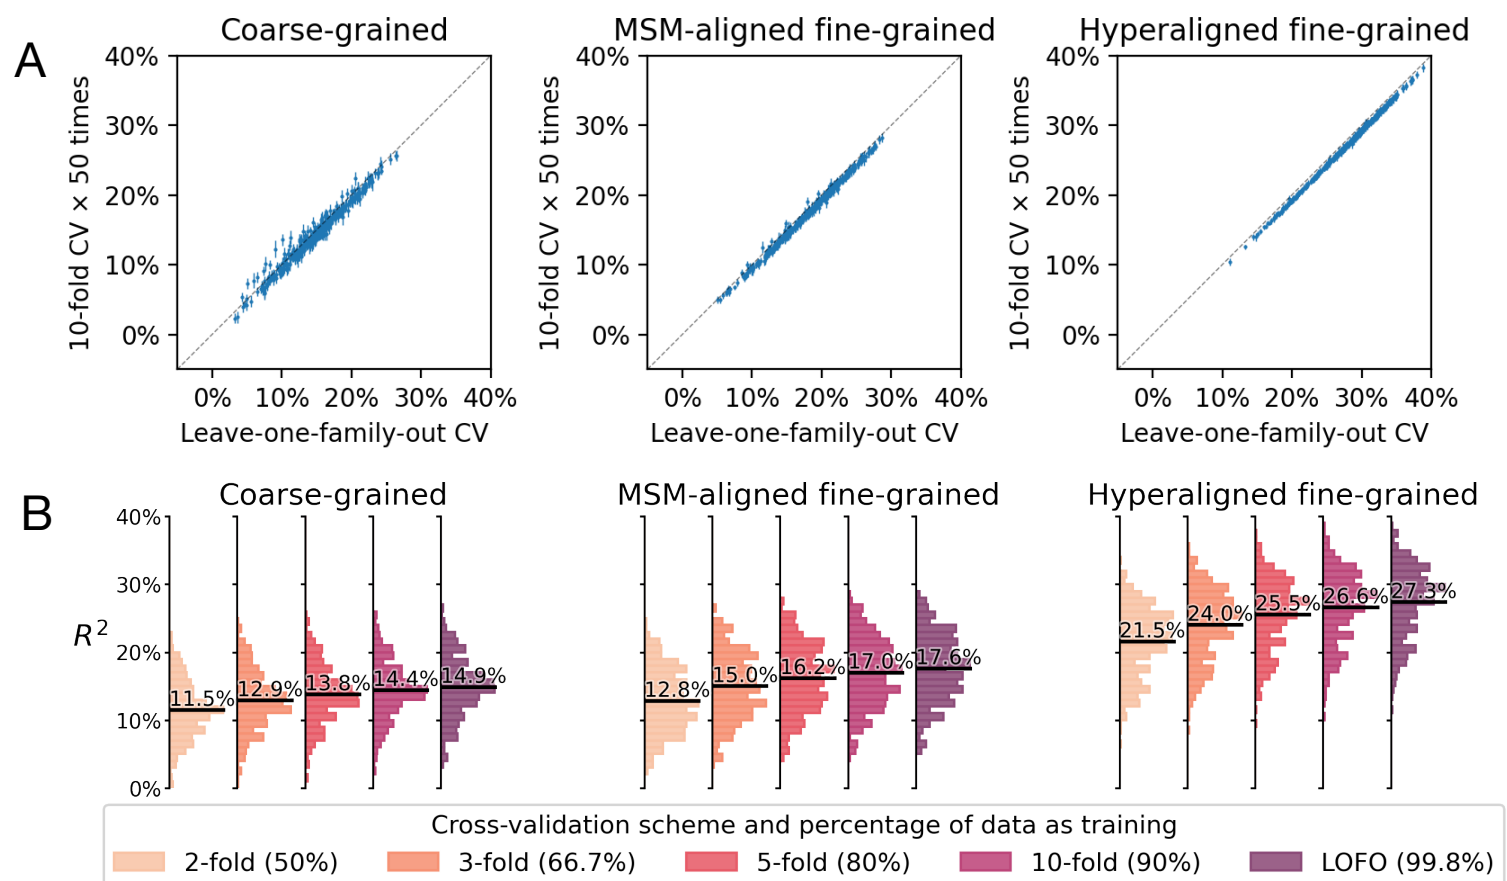

# Resting fMRI functional connectivity

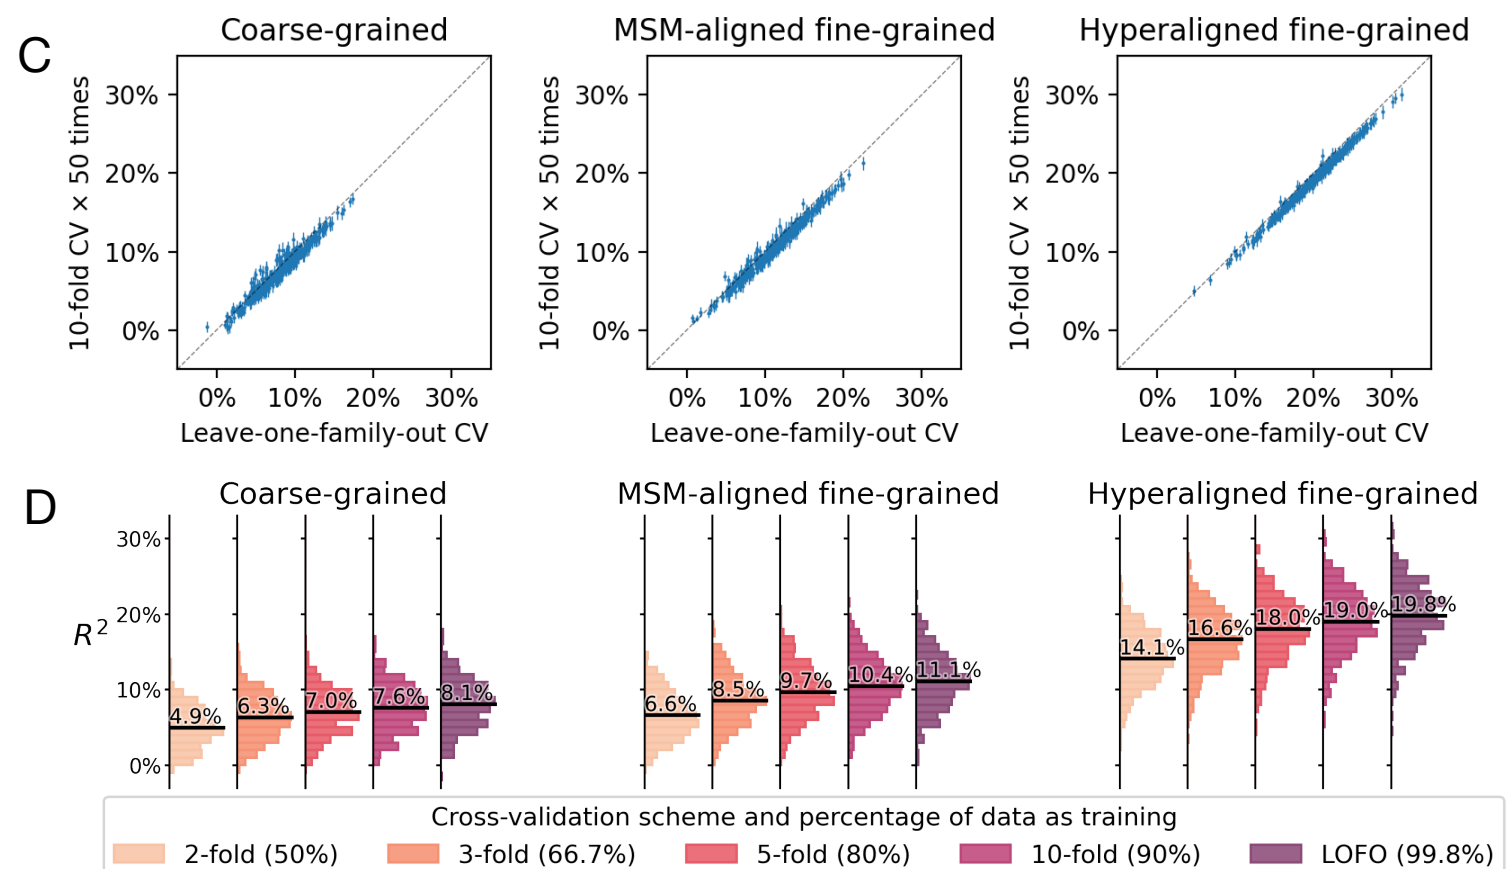

Supplement: supp [file elife_poa_e64058_Figure_3_figure_supplement_8.pdf › elife_poa_e64058_Figure_3_figure_supplement_8.pdf]

## Task fMRI functional connectivity

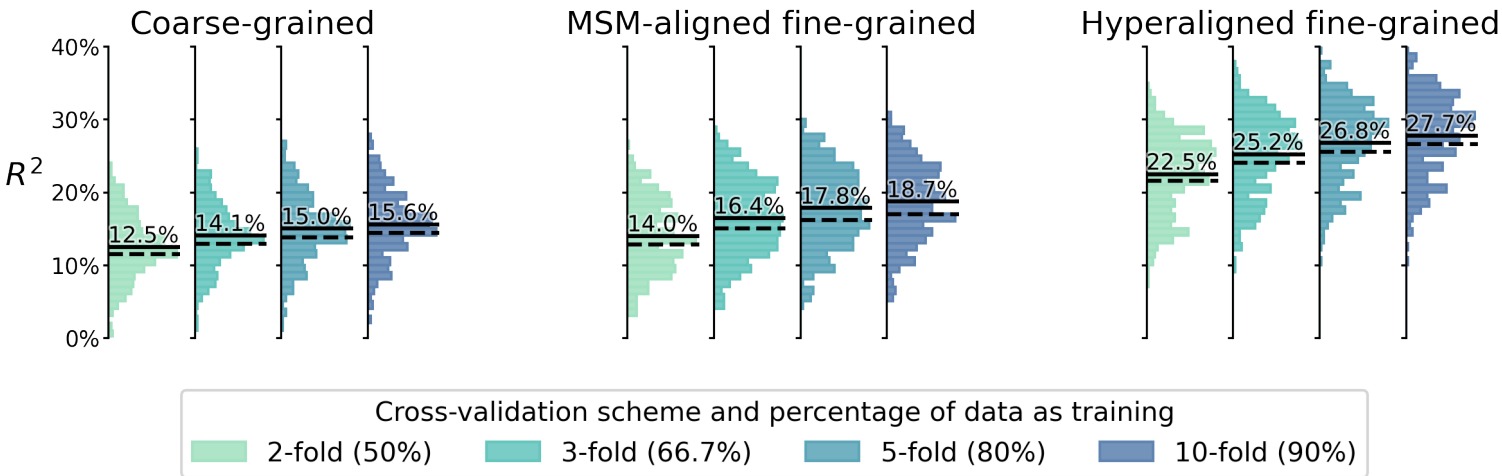

## Resting fMRI functional connectivity

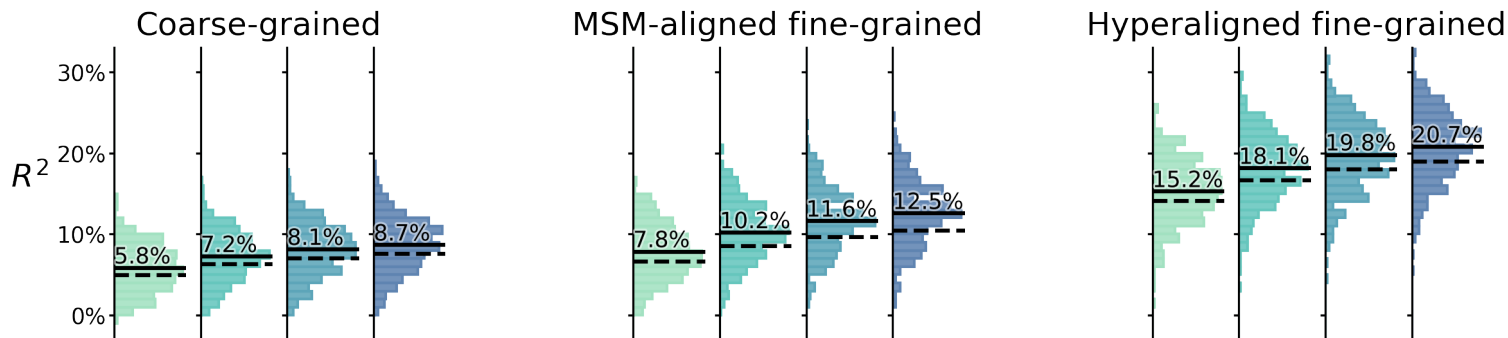

Supplement: supp [file elife_poa_e64058_Figure_3_figure_supplement_9.pdf › elife_poa_e64058_Figure_3_figure_supplement_9.pdf]
